# Supplementary material for: Metabolomic responses to the mechanical wounding of Catharanthus roseus’ upper leaves
Source: PeerJ. 2023 Mar 20;11:e14539. doi: 10.7717/peerj.14539 (PMC10035419; doi:10.7717/peerj.14539)
Supplement: Supplemental Information 1 [file peerj-11-14539-s001.xlsx]

## Sheet: Tissue screen-PCS
	CK-UL	WUL-UL	WLL-UL	CK-ML	WUL-ML	WLL-ML	CK-DL	WUL-DL	WLL-DL	CK-S	WUL-S	WLL-S	CK-R	WUL-R	WLL-R
3-4-Hydroxybenzoic acid	0.246	29.019	0	0	0	0	0	1.118	0	8.603	0	0	0	0	0
2,5-Dihydroxybenzoic acid	0.974	5.853	0	9.543	1.644	0.297	2.275	14.476	0	5.2	1.622	0.297	7.079	0.217	0.597
Genistein	0.021	0.433	0.272	0.732	0.061	0.222	0.121	0.35	0	4.496	0.138	0.222	0.42	0.474	3.718
Apigenin	0.021	0	0.273	0.732	1.008	0.027	1.11	0.395	0	3.925	0.239	0.027	0.436	0.477	3.614
Daidzein	2.315	0.133	0.218	0.748	0.262	0.033	0.424	0.703	0.177	1.19	1.515	0.033	0.126	0.298	1.121
Syringic acid	0.101	3.941	0.644	0.282	3.649	1.213	0.506	0.898	0.188	5.126	6.332	1.213	5.49	0.202	6.653
Petunidin	20.086	15.973	18.708	23.515	20.045	12.306	27.852	30.254	20.208	0	0	12.306	5.978	0.08	0.535
Naringenin	1.912	2.634	1.929	0.354	0.249	0	0.271	0	0	0	0.801	0	0.24	0.058	6.881
Hesperidin	0.532	0.069	0.792	0.062	0.153	0	0.189	0.127	0.502	0.293	2.427	0	3.134	0.274	0.371
Quercetin-3-O-rhamnoside	0	0.248	0	0.237	0	0.035	0.604	0	0.151	0.238	0	0.02	0	0.057	0
Chlorogenic acid	2798.08	1865.48	2360.01	1837.07	1696.26	2378.1	1677.42	1822.01	1470.9	4.07	1.248	0.171	58.179	197.525	194.673
Salicylic acid	0.619	1.243	0.248	0.354	0.755	2.193	4.238	0	0.597	0	0	2.193	0.295	0.368	0.269
Ferulic acid	34.277	95.596	89.934	38.782	54.361	72.341	27.455	31.301	14.053	8.867	6.183	72.341	18.972	5.833	94.006
Myricitrin	0	0.507	0	0.113	1.71	0	0.234	0	0.103	0.075	0.167	0	0.065	0	1.014
Luteolin	0	1.816	1.09	0.037	0	0	0.381	0.447	0.628	0	0.379	0	0.156	0.883	0.263
Catechin	3.273	2.017	3.641	6.536	4.781	3.289	5.229	0.161	6.357	1.331	0.36	3.289	0.809	0.131	2.367
Myricetin	0.226	0.155	0.055	0.087	0	0.316	0.058	0.161	0.897	0.051	0.825	0.316	0.066	0	0.508
Cinnamic acid	12521.9	12236.3	12015.7	13891.3	11695.4	11994.1	13254.1	13096.9	12388.3	13949.9	12048.1	11994.1	12280.5	4181.16	12090.1
p-Coumaric acid	0	0	0	0	0	0	0	0	0	17.492	21.136	0	0	0	0
hesperetin	0.185	0	0.214	0.051	0.943	0.176	0.108	1.096	0	0.224	0.103	0.03	0.107	0.206	0.097
Quercetin	0	14.557	0	0	0.316	1.125	1.325	0	0	14.724	0	0	7.03	4.572	0
Gallic acid	1.043	0	19.065	2.248	12.747	0	0.381	0	0.395	1.78	1.188	2.673	0	0	4.736
Caffeic acid	1.773	3.694	2.394	0.758	1.668	1.092	0.347	2.809	2.393	1.082	0.35	0.12	1.35	1.919	0.994
Naringin	0.618	0.274	0.32	0.406	0.181	0.11	2.094	0	0.305	0	0	0.097	0.151	1.347	0.121
Kaempferol	0.101	5.28	15.769	3.005	2.798	4.298	0.288	0.279	2.229	0.031	0.383	0.901	3.485	3.291	1.722
liquiritigenin	0.496	0.659	0.207	0	0.391	0	0.567	0	1.34	0.192	0	0.142	0	0.15	0.103
Galangin	0	0.261	0.692	0.734	0.404	0.084	0.078	0.893	1.14	0.064	0.138	0.06	0.317	0.091	1.621
rutin	0	0	0	0	0.154	0	0	0	0	0.526	0.194	0.321	0	0.054	0
Isoliquiritigenin	0.329	0.169	0	0.081	0	0	0.438	0.038	1.534	0.534	0.55	0	1.85	0	0
vanillic acid	0.506	0.264	0.163	0.218	0.11	0.196	0.062	1.585	1.471	0	0	12.781	0	0.705	0

## Sheet: Tissue  screen-TIAs
	CK-UL	CK-DL	CK-ML	CK-S	CK-MR	WUL-UL	WUL-DL	WUL-ML	WUL-S	WUL-R	WLL-UL	WLL-DL	WLL-ML	WLL-S	WLL-R
	1--1	1--2	1--3	1--4	1--5	5--2	5--3	2--4	5--5	5--6	6--1	6--3	6--4	6--5	6--6
loganine	0.08308	0.142916	0.117127	0.0202077	0.343028	0.0655177	0.115919	0.0772576	0.0195641	0.403304	0.0723204	0.0940582	0.107191	0.0377778	0.372766
tryptamine	0.00248279	0.00235416	0.00238016	0.00298986	0.000369104	0.00282371	0.00250666	0.00249055	0.00333637	0.00248019	0.0024724	0.00251858	0.00239793	0.00275722	0.0025134
tabersonine	0.0181495	0.0200854	0.0236675	0.000325517	0.0288551	0.0190408	0.0203088	0.0191182	0.000238826	0.0456072	0.0270465	0.015553	0.0240666	0.000669379	0.0382295
spertine	0.0469766	0.032366	0.041899	0.0589696	0.662903	0.0619547	0.0273915	0.0346183	0.047481	0.307918	0.0662478	0.0268714	0.0399451	0.070874	0.394773
vindoline	0.727515	0.592167	0.684158	0	0.4054	0.823627	0.582854	0.672296	0	0.603511	0.813196	0.53398	0.669673	0	0.482751
catharanthine	0.0664371	0.0628608	0.0780439	0	0.0187906	0.0718972	0.0621603	0.0642266	0	0.0572763	0.0736728	0.0431772	0.0732416	0	0.0318161
vinblastine	0.235211	0.161415	0.0880422	0	0	0	0.0298846	0.00496777	0	0.0216187	0.0142791	0.0239645	0	0	0.0446499

## Sheet: PCs
	CK-0h-UL	WUL-0h-WUL	WUL-0h-UL	WUL-1h-WUL	WUL-1h-UL	WUL-3h-WUL	WUL-3h-UL	WUL-5h-WUL	WUL-5h-UL	WLL-0h-UL	WLL-1h-UL	WLL-3h-UL	WLL-5h-UL
p-hydroxycinnamic acid	0	0	0	0	0	0	0	0	0	0	0	0	0
3-4-Hydroxybenzoic acid	0.246	0.246	0	0.25	0	0.146	0	0	29.019	0	20.759	31.848	0
2,5-Dihydroxybenzoic acid	0.974	0.974	2.35	0.98	2.275	0.974	2.275	1.838	5.853	0.97	0.983	0.724	0
Genistein	0.021	0.021	0.121	0.021	0.13	0.03	0.121	0.668	0.433	1.014	0.307	0.144	0.272
Apigenin	0.021	0.02	1.11	0.021	1.11	0.021	1.2	0.908	0	1.025	0.583	0.143	0.273
Daidzein	2.315	2.315	0.5	2.315	0.424	2.315	0.48	0.058	0.133	0.028	0.294	0.454	0.218
Syringic acid	0.101	0.101	0.506	0.101	0.4	0.101	0.506	1.006	3.941	3.298	0.597	3.218	0.644
Petunidin	20.086	20.086	27.852	20	27.852	20.086	27.852	14.463	15.973	8.772	17.412	12.101	18.708
Naringenin	1.912	1.912	0.271	1.912	0.271	1.8	0.271	0	2.634	0.729	0.53	0.919	1.929
Hesperidin	0.532	0.532	0.2	0.532	0.16	0.532	0.17	0.41	0.069	1.844	0.058	1.175	0.792
Quercetin-3-O-rhamnoside	0	0	0.604	0	0.604	0	0.604	0.134	0.248	0	0	1.354	0
Chlorogenic acid	2798.08	2700.08	1677.42	2798.08	1677.42	2798.08	1656.42	2093.73	1865.48	2234.23	1961.32	2162.41	2360.01
Salicylic acid	0.619	0.619	4.238	0.619	4.238	0.619	4.238	0.467	1.243	3.734	2.395	0.112	0.248
Ferulic acid	34.277	34.7	27.455	34.4	27.455	34.277	27.46	77.457	95.596	26.345	53.642	53.031	89.934
Myricitrin	0	0	0.234	0	0.22	0	0.234	0	0.507	0	1.221	0.179	0
Luteolin	0	0	0.381	0	0.381	0	0.31	0	1.816	0	0.403	0	1.09
Catechin	3.273	3.273	5.3	3.273	5.1	3.273	5.229	5.595	2.017	3.1	0.587	2.397	3.641
Myricetin	0.226	0.226	0.06	0.226	0.053	0.126	0.058	0	0.155	0.308	0.359	0.079	0.055
Cinnamic acid	12521.9	12521.9	13200.1	12300.9	13254.1	12521.9	13004.1	12152	12236.3	12749.2	13062.2	12124	12015.7
p-Coumaric acid	0	0	0	0	0	0	0	0	0	0	0	0	0
hesperetin	0.185	0.185	0.108	0.185	0.108	0.125	0.108	0	0	0	0.058	0	0.214
Quercetin	0	0	1.325	0	1.4	0	1.325	0	14.557	3.491	1.238	0	0
Gallic acid	1.043	1.043	0.381	1.043	0.381	1.043	0.361	12.1	0	6.349	3.334	0.239	19.065
Caffeic acid	1.773	1.773	0.347	1.773	0.347	1.763	0.347	10.054	3.694	2.239	0.809	3.138	2.394
Naringin	0.618	0.618	2	0.567	2.094	0.618	2.064	0.11	0.274	0	0.798	0.102	0.32
Kaempferol	0.101	0.101	0.288	0.101	0.288	0.181	0.288	14.134	5.28	0.413	3.111	2.961	15.769
liquiritigenin	0.496	0.496	0.567	0.496	0.567	0.496	0.527	0.193	0.659	0.305	0.283	0.381	0.207
Galangin	0	0	0.078	0	0.08	0	0.078	0.552	0.261	0	1.224	0.144	0.692
rutin	0	0	0	0	0	0	0	0	0	0	0	1.037	0
Isoliquiritigenin	0.329	0.3	0.44	0.329	0.41	0.329	0.418	0.079	0.169	0	0	0.104	0
vanillic acid	0.506	0.506	0.062	0.5	0.062	0.556	0.062	0.075	0.264	0.098	0	3.531	0.163

## Sheet: TIAs
	CK-0h-UL	CK-1h-UL	CK-3h-UL	CK-5h-UL	WUL-0h-WUL	WUL-0h-UL	WUL-1h-WUL	WUL-1h-UL	WUL-3h-WUL	WUL-3h-UL	WUL-5h-WUL	WUL-5h-UL	WLL-0h-UL	WLL-1h-UL	WLL-3h-UL	WLL-5h-UL
loganine	0.08308	0.0562	0.08308	0.09	0.0544186	0.0655177	0.0723204	0.0664644	0.0575872	0.0695817	0.0899782	0.0706553	0.0784005	0.0693218	0.0892606	0.0959376
tryptamine	0.00248279	0.00537	0.004	0.00248279	0.00241746	0.00282371	0.0024724	0.00231085	0.00230441	0.00258627	0.00234958	0.00274295	0.00250274	0.00249567	0.0024605	0.00228147
tabersonine	0.0181495	0.0181495	0.0181495	0.02	0	0.0190408	0.0270465	0.0252254	0.0187105	0	0.000435254	0.0275416	0.00136805	0.0175024	0.00175787	0.00494828
spertine	0.0469766	0.0469766	0.049	0.0436	0.0554077	0.0619547	0.0662478	0.0584137	0.0495335	0.0477208	0.0642734	0.0538148	0.0605371	0.0563762	0.0622334	0.0750275
vindoline	0.727515	0.6543	0.9	0.727515	0.776138	0.823627	0.813196	0.761834	0.771395	0.799307	0.816242	0.775182	0.82261	0.747456	0.793679	0.864401
catharanthine	0.0664371	0.063	0.05	0.07	0.0519927	0.0718972	0.0736728	0.0737988	0.0648247	0.0673573	0.0700446	0.0772568	0.0599967	0.067541	0.0699947	0.0667784
vinblastine	0.235211	0.341	0.235211	0.235211	0.005006	0	0.0142791	0.00950041	0.00428139	0.00183966	0.0109755	-0.02588	0.0481093	0	0	0.00608292
